# Supplementary material for: Impact of comorbid borderline personality disorder on inpatient treatment for bulimia nervosa: analysis of routine data
Source: Springer Nature journal article supplement (doi:10.1186/s40479-018-0098-4), 2019-01-16
Supplement: MOESM1 [file 40479_2018_98_MOESM1_ESM.pdf]

SUPPLEMENTAL TABLE 1. Mean values for the repeated measures analyses of variance in Tables 2 and 3.

| Variable                      | Time      | BN, <i>M</i> ( <i>SD</i> ) | BN+BPD, <i>M</i> ( <i>SD</i> ) |
|-------------------------------|-----------|----------------------------|--------------------------------|
| EDI-2 total score             | Admission | 1.14 (0.45)                | 1.46 (0.39)                    |
|                               | Discharge | 0.67 (0.44)                | 1.06 (0.50)                    |
| EDI-2 drive for thinness      | Admission | 1.91 (0.88)                | 2.32 (0.68)                    |
|                               | Discharge | 1.03 (0.90)                | 1.60 (0.97)                    |
| EDI-2 bulimia                 | Admission | 1.41 (0.80)                | 1.54 (0.76)                    |
|                               | Discharge | 0.27 (0.50)                | 0.42 (0.55)                    |
| EDI-2 body dissatisfaction    | Admission | 1.98 (0.89)                | 2.41 (0.64)                    |
|                               | Discharge | 1.45 (0.96)                | 2.04 (0.90)                    |
| EDI-2 ineffectiveness         | Admission | 1.09 (0.68)                | 1.61 (0.62)                    |
|                               | Discharge | 0.60 (0.60)                | 1.17 (0.73)                    |
| EDI-2 perfectionism           | Admission | 1.06 (0.73)                | 1.16 (0.81)                    |
|                               | Discharge | 0.77 (0.63)                | 1.03 (0.77)                    |
| EDI-2 interpersonal distrust  | Admission | 0.84 (0.59)                | 1.19 (0.63)                    |
|                               | Discharge | 0.55 (0.52)                | 0.86 (0.63)                    |
| EDI-2 interoceptive awareness | Admission | 1.16 (0.68)                | 1.55 (0.65)                    |
|                               | Discharge | 0.61 (0.61)                | 1.10 (0.71)                    |
| EDI-2 maturity fears          | Admission | 0.84 (0.64)                | 0.93 (0.67)                    |
|                               | Discharge | 0.62 (0.53)                | 0.74 (0.62)                    |
| EDI-2 sexual asceticism       | Admission | 0.89 (0.52)                | 1.07 (0.51)                    |
|                               | Discharge | 0.52 (0.47)                | 0.82 (0.58)                    |
| EDI-2 impulse regulation      | Admission | 0.54 (0.46)                | 1.00 (0.56)                    |
|                               | Discharge | 0.34 (0.42)                | 0.77 (0.59)                    |
| EDI-2 social insecurity       | Admission | 1.00 (0.56)                | 1.38 (0.52)                    |
|                               | Discharge | 0.65 (0.52)                | 1.09 (0.56)                    |
| BDI-II                        | Admission | 29.20 (11.19)              | 37.37 (10.54)                  |
|                               | Discharge | 14.49 (11.74)              | 25.71 (12.85)                  |
| GSI                           | Admission | 1.34 (0.75)                | 1.80 (0.74)                    |
|                               | Discharge | 0.82 (0.64)                | 1.39 (0.77)                    |
| GAF                           | Admission | 46.82 (9.96)               | 42.93 (7.84)                   |
|                               | Discharge | 61.34 (12.64)              | 55.88 (9.21)                   |
| BMI                           | Admission | 22.25 (4.33)               | 22.78 (4.46)                   |
|                               | Discharge | 22.65 (4.01)               | 23.56 (4.12)                   |

*Note.* *M* = mean, *SD* = standard deviation, EDI-2 = Eating Disorder Inventory 2, BDI-II = Beck Depression Inventory II, GSI = Global Severity Index, GAF = Global Assessment of Functioning, BMI = body mass index.
